# Supplementary figures and images for: Physical activity, sedentary behavior and total wellness changes among sedentary adults: a 4-week randomized controlled trial
Source: Springer Nature journal article supplement (doi:10.1186/1477-7525-11-183), 2013-01-01

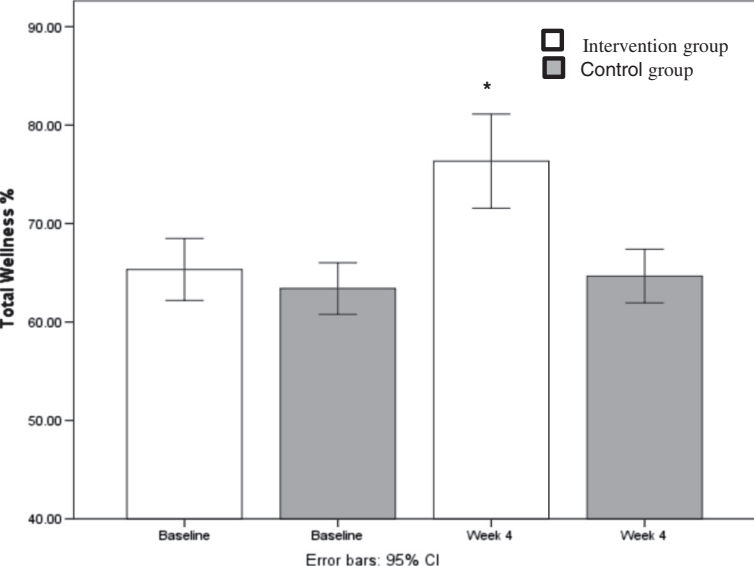

Supplement: 12955_2013_1410_MOESM1_ESM.pdf [file 12955_2013_1410_MOESM1_ESM.pdf]
